# Supplementary material for: Single-molecule magnet behavior in heterolopetic Dy3+-chloro-diazabutadiene complexes: influence of the nuclearity and ligand redox state
Source: Royal Society of Chemistry journal article supplement (doi:10.1039/d0dt02305a), 2020-01-01
Supplement: d0dt02305a1.pdf [file d0dt02305a1.pdf]

## SUPPORTING INFORMATION

### **Single-molecule magnet behavior in heterolopetic Dy<sup>3+</sup> chloro-diazabutadiene complexes: influence of the nuclearity and ligand redox state.**

Jérôme Long\*,<sup>a</sup> Aleksei O. Tolpygin,<sup>b</sup> Anton V. Cherkasov,<sup>b</sup> Konstantin A. Lyssenko,<sup>c,d</sup> Yannick Guari<sup>a</sup>, Joulia Larionova<sup>a</sup> and Alexander A Trifonov\*<sup>b,c</sup>

<sup>a</sup> *ICGM, Univ. Montpellier, CNRS, ENSCM, Montpellier, France.*

<sup>b</sup> *Institute of Organometallic Chemistry of Russian Academy of Sciences, 49 Tropinina str., GSP-445, 603950, Nizhny Novgorod, Russia. E-mail: trif@iomc.ras.ru*

<sup>c</sup> *Institute of Organoelement Compounds of Russian Academy of Sciences, 28 Vavilova str., 119334, Moscow, Russia.*

<sup>d</sup> *M.V. Lomonosov Moscow State University, Chemistry Department, Leninskie Gory 1, Build 3, Moscow 119991, Russia.*

## TABLE OF CONTENTS

|                                                                                                                                                                                                                                             |    |
|---------------------------------------------------------------------------------------------------------------------------------------------------------------------------------------------------------------------------------------------|----|
| Figure S1: Perspective view of the crystal packing for 1 and 2 along the <i>b</i> and <i>a</i> crystallographic axes, respectively. Hydrogen atoms have been omitted for clarity. ....                                                      | 4  |
| Figure S2: Perspective view of the crystal packing for 3 and 4 along the <i>a</i> crystallographic axes. Hydrogen atoms have been omitted for clarity.....                                                                                  | 5  |
| Figure S3: Frequency dependence of the in-phase ( $\chi'$ ) and out-of phase ( $\chi''$ ) susceptibilities for 1- 4 under a zero dc-field. ....                                                                                             | 6  |
| Figure S4: Temperature dependence of $\chi'$ and $\chi''$ for 1-4 for different frequencies under a zero dc-field. ....                                                                                                                     | 7  |
| Figure S5: Cole-Cole (Argand) plot obtained using the ac susceptibility data for 1-4 (0 Oe). The solid lines correspond to the best fit with a generalized Debye model or with a sum of two Debye functions. <sup>5</sup> .....             | 8  |
| Figure S6: Frequency dependence of the in-phase ( $\chi'$ ) and out-of phase ( $\chi''$ ) susceptibilities for 1- 4 under various dc fields.....                                                                                            | 9  |
| Figure S7: Field dependence of the relaxation time for 4 (2 K). The red line represents the fit with Eq. 3.....                                                                                                                             | 10 |
| Figure S8: Frequency dependence of the in-phase ( $\chi'$ ) and out-of phase ( $\chi''$ ) susceptibilities for 1-4 under the corresponding dc-fields. ....                                                                                  | 11 |
| Figure S9: Cole-Cole (Argand) plot obtained using the ac susceptibility data for 1-4 under the corresponding dc fields. The solid lines correspond to the best fit with a generalized Debye model or with a sum of two Debye functions..... | 12 |
| Figure S10: Orientation of the anisotropic axis (purple) in 1-2 obtained from the MAGELLAN software. <sup>1</sup> .....                                                                                                                     | 13 |
| Figure S11: Orientation of the anisotropic axis (purple) in 3 obtained from the MAGELLAN <sup>1</sup> software and considering different negative charge values on the atoms of the NCCN fragment.....                                      | 14 |
| Figure S12: Orientation of the anisotropic axis (purple) in 4 obtained from the MAGELLAN software. <sup>1</sup> .....                                                                                                                       | 15 |
| Table S1. Crystal Data and Structure Refinement Details for Complexes 1-4 .....                                                                                                                                                             | 16 |
| .....                                                                                                                                                                                                                                       | 16 |
| Table S2. SHAPE analysis for compounds 1-3.....                                                                                                                                                                                             | 16 |
| Table S3. Fitting of the Cole-Cole plots with a sum of two generalized Debye functions under a zero dc-field for 1 in the temperature range 1.8-3.4 K.....                                                                                  | 17 |
| Table S4. Fitting of the Cole-Cole plots with a sum of two generalized Debye functions under a zero dc-field for 1 in the temperature range 4.2-5.8 K.....                                                                                  | 17 |
| Table S5. Fitting of the Cole-Cole plots with a generalized Debye model under a zero dc field for 3. ....                                                                                                                                   | 17 |
| .....                                                                                                                                                                                                                                       | 17 |
| Table S6. Fitting of the Cole-Cole plots with a generalized Debye model under a zero dc field for 4. ....                                                                                                                                   | 18 |
| .....                                                                                                                                                                                                                                       | 18 |

|                                                                                                                                                                        |    |
|------------------------------------------------------------------------------------------------------------------------------------------------------------------------|----|
| Table S7: Fit parameters of the temperature dependence of the relaxation time for 1 from a combination of Raman and QTM process (zero field) or Raman (1000 Oe). ..... | 18 |
| Table S8: Fit parameters of the field dependence of the relaxation time at 15 K for 4.....                                                                             | 18 |
| Table S9. Fitting of the Cole-Cole plots with a sum of two generalized Debye functions under a 1000 Oe dc-field for 1. ....                                            | 18 |
| Table S10. Fitting of the Cole-Cole plots with a sum of two generalized Debye functions under a 1000 Oe dc-field for 4. ....                                           | 19 |
| References .....                                                                                                                                                       | 19 |

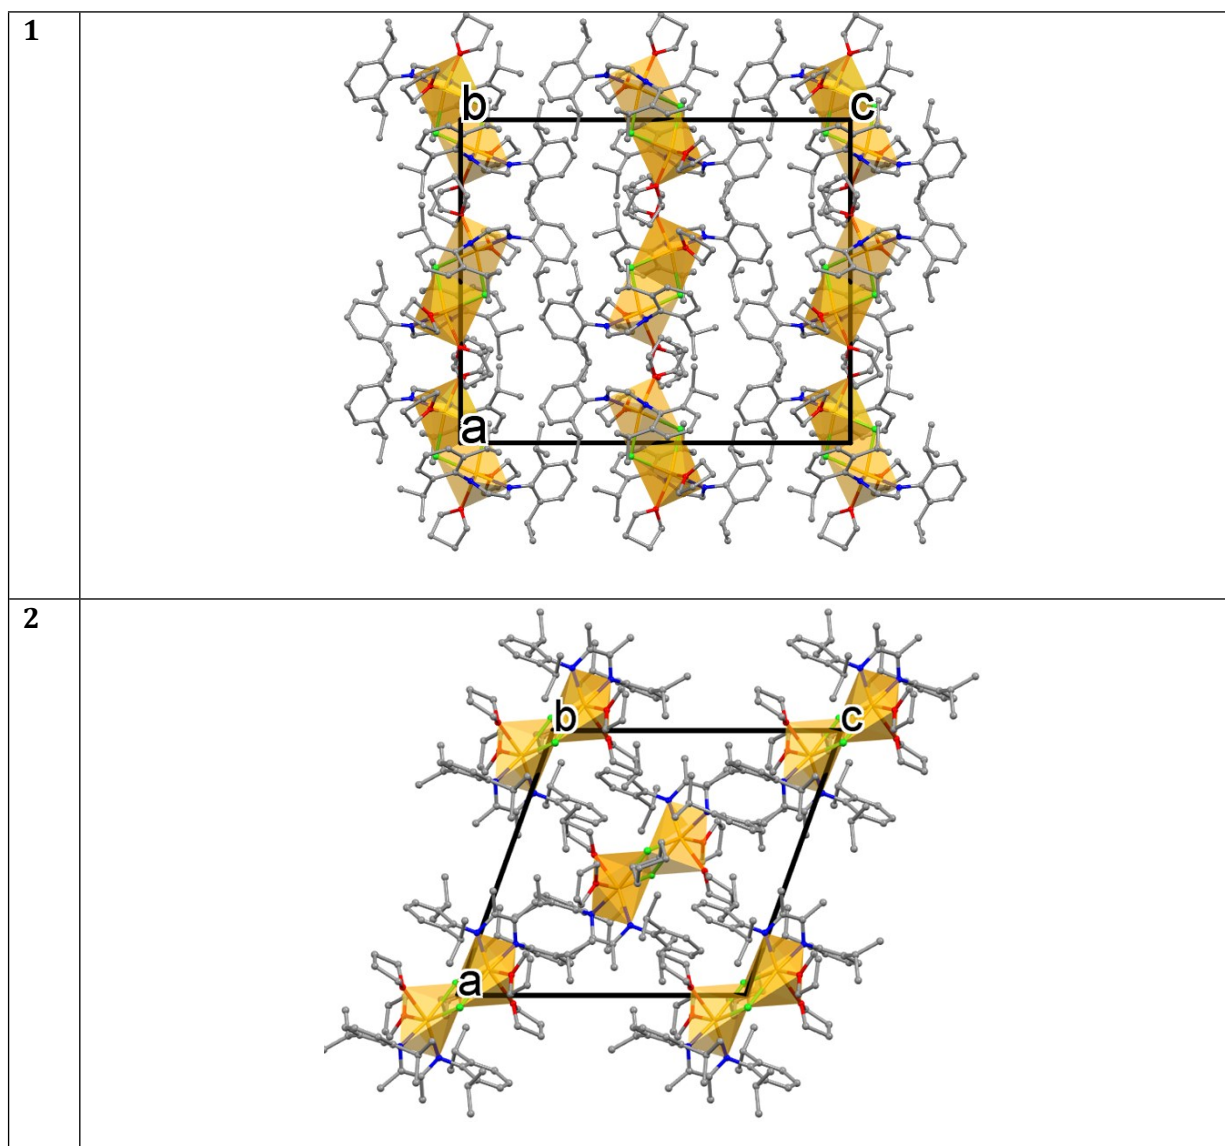

**Figure S1:** Perspective view of the crystal packing for **1** and **2** along the *b* and *a* crystallographic axes, respectively. Hydrogen atoms have been omitted for clarity.

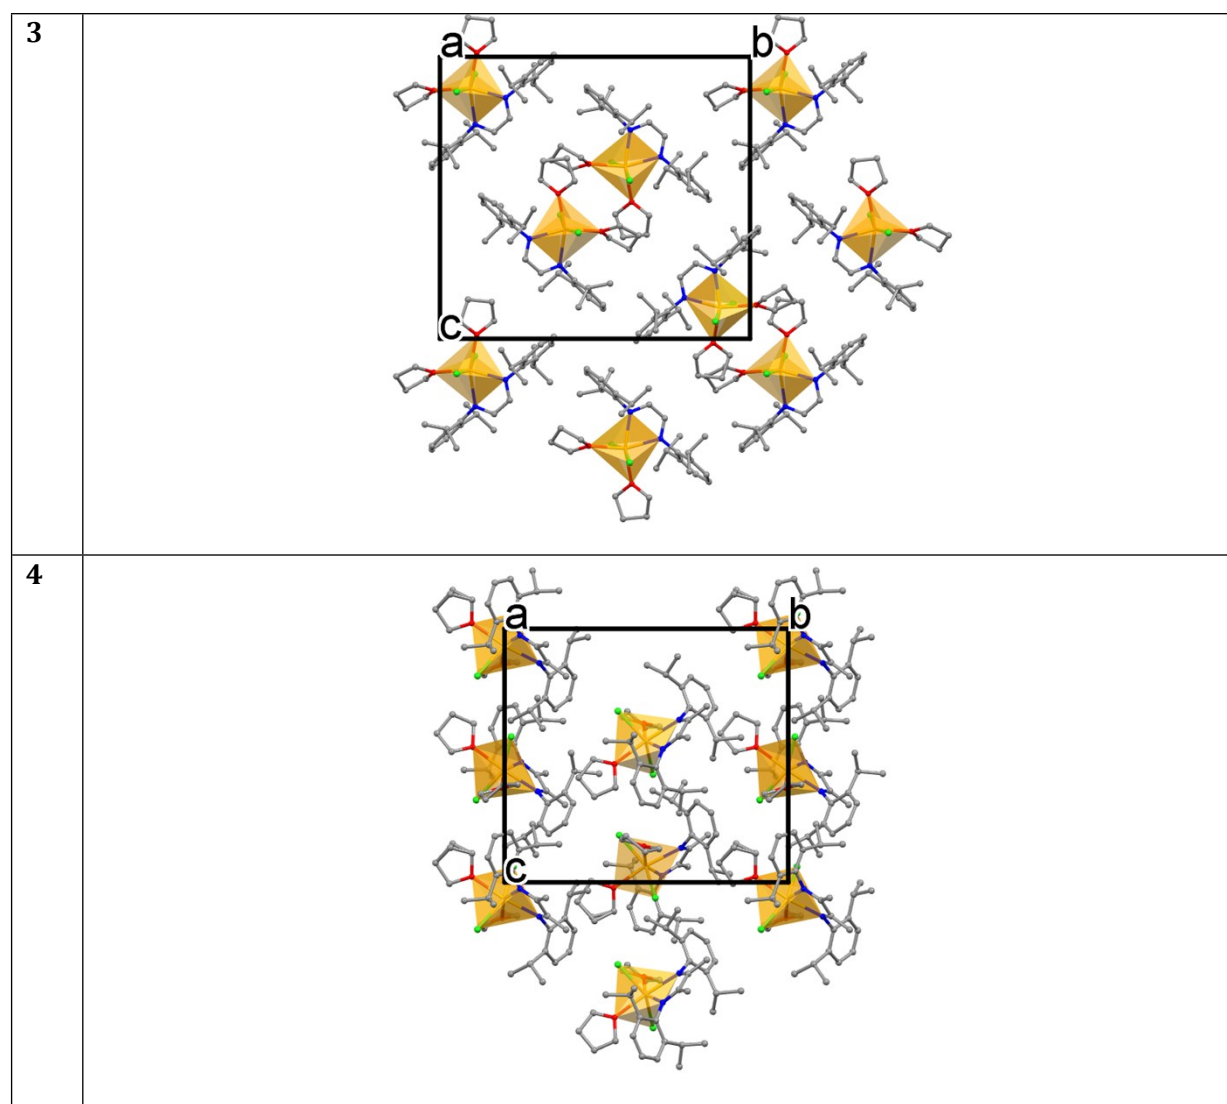

**Figure S2:** Perspective view of the crystal packing for **3** and **4** along the *a* crystallographic axes. Hydrogen atoms have been omitted for clarity.

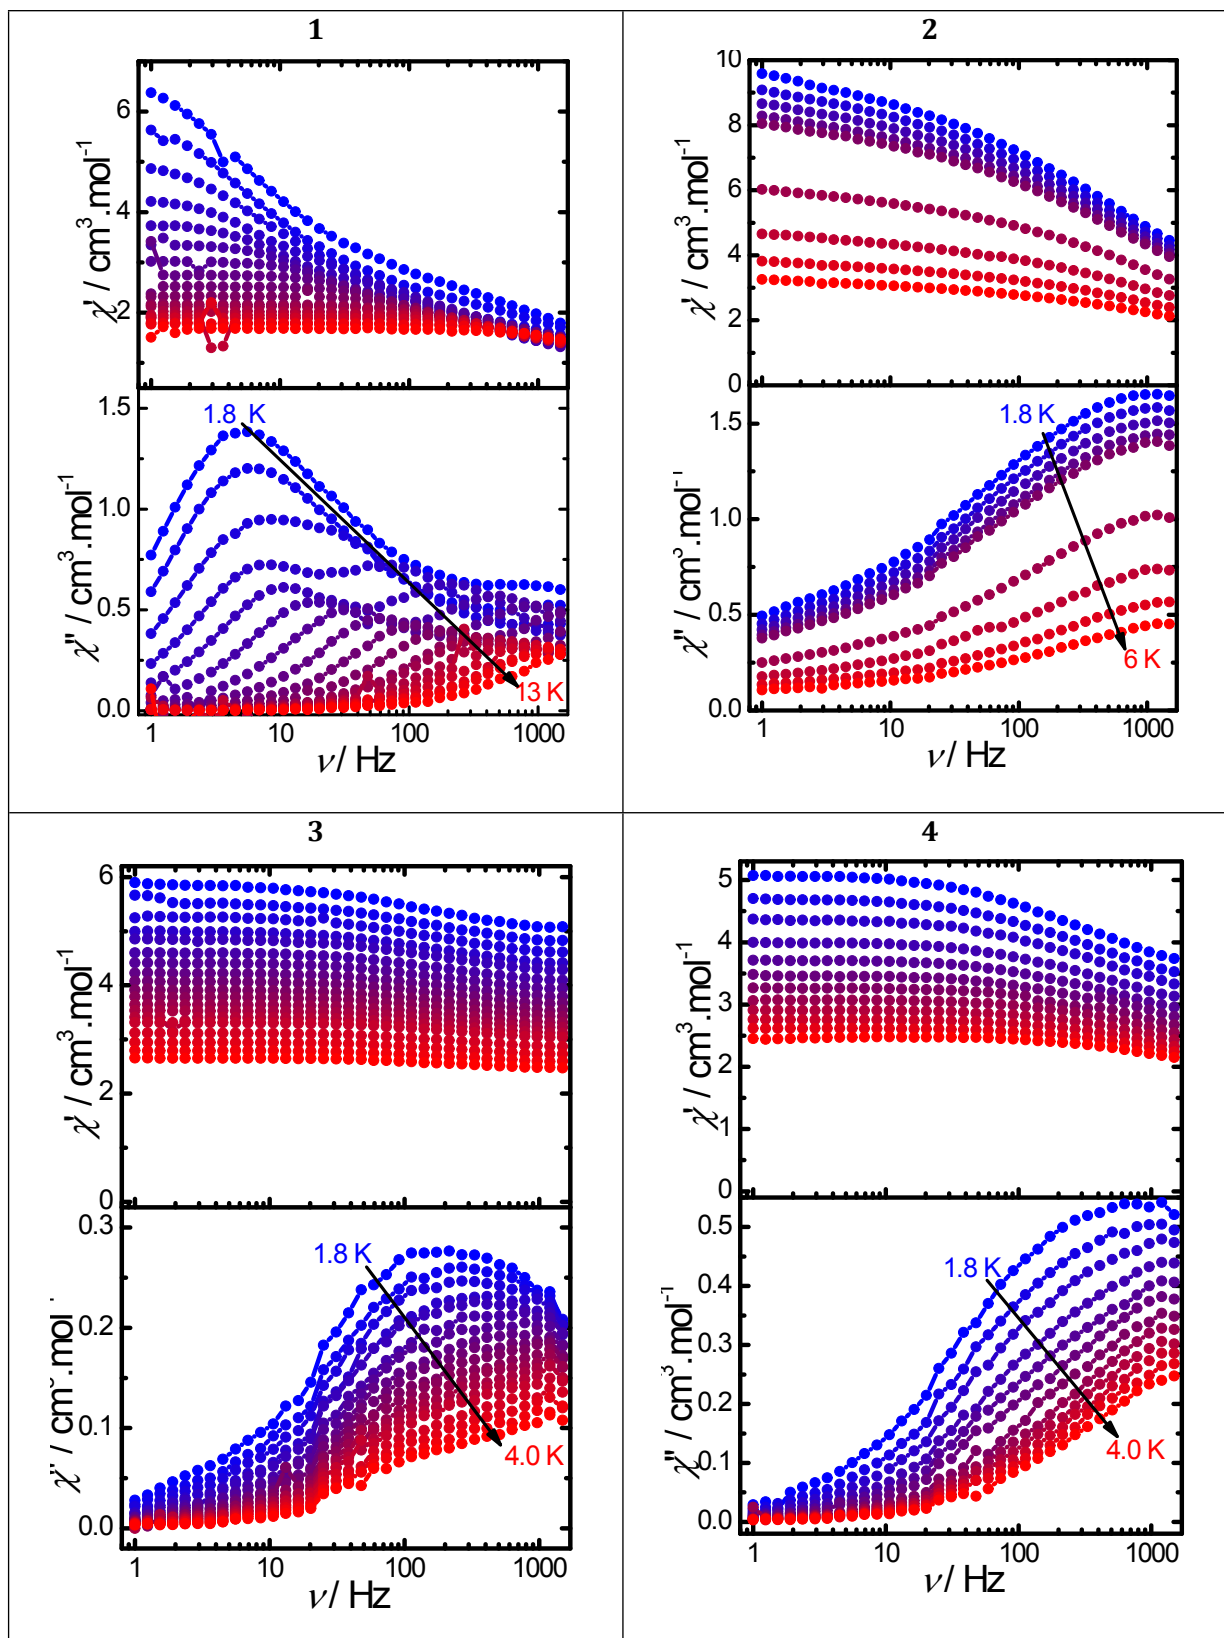

**Figure S3:** Frequency dependence of the in-phase ( $\chi'$ ) and out-of phase ( $\chi''$ ) susceptibilities for 1- 4 under a zero dc-field.

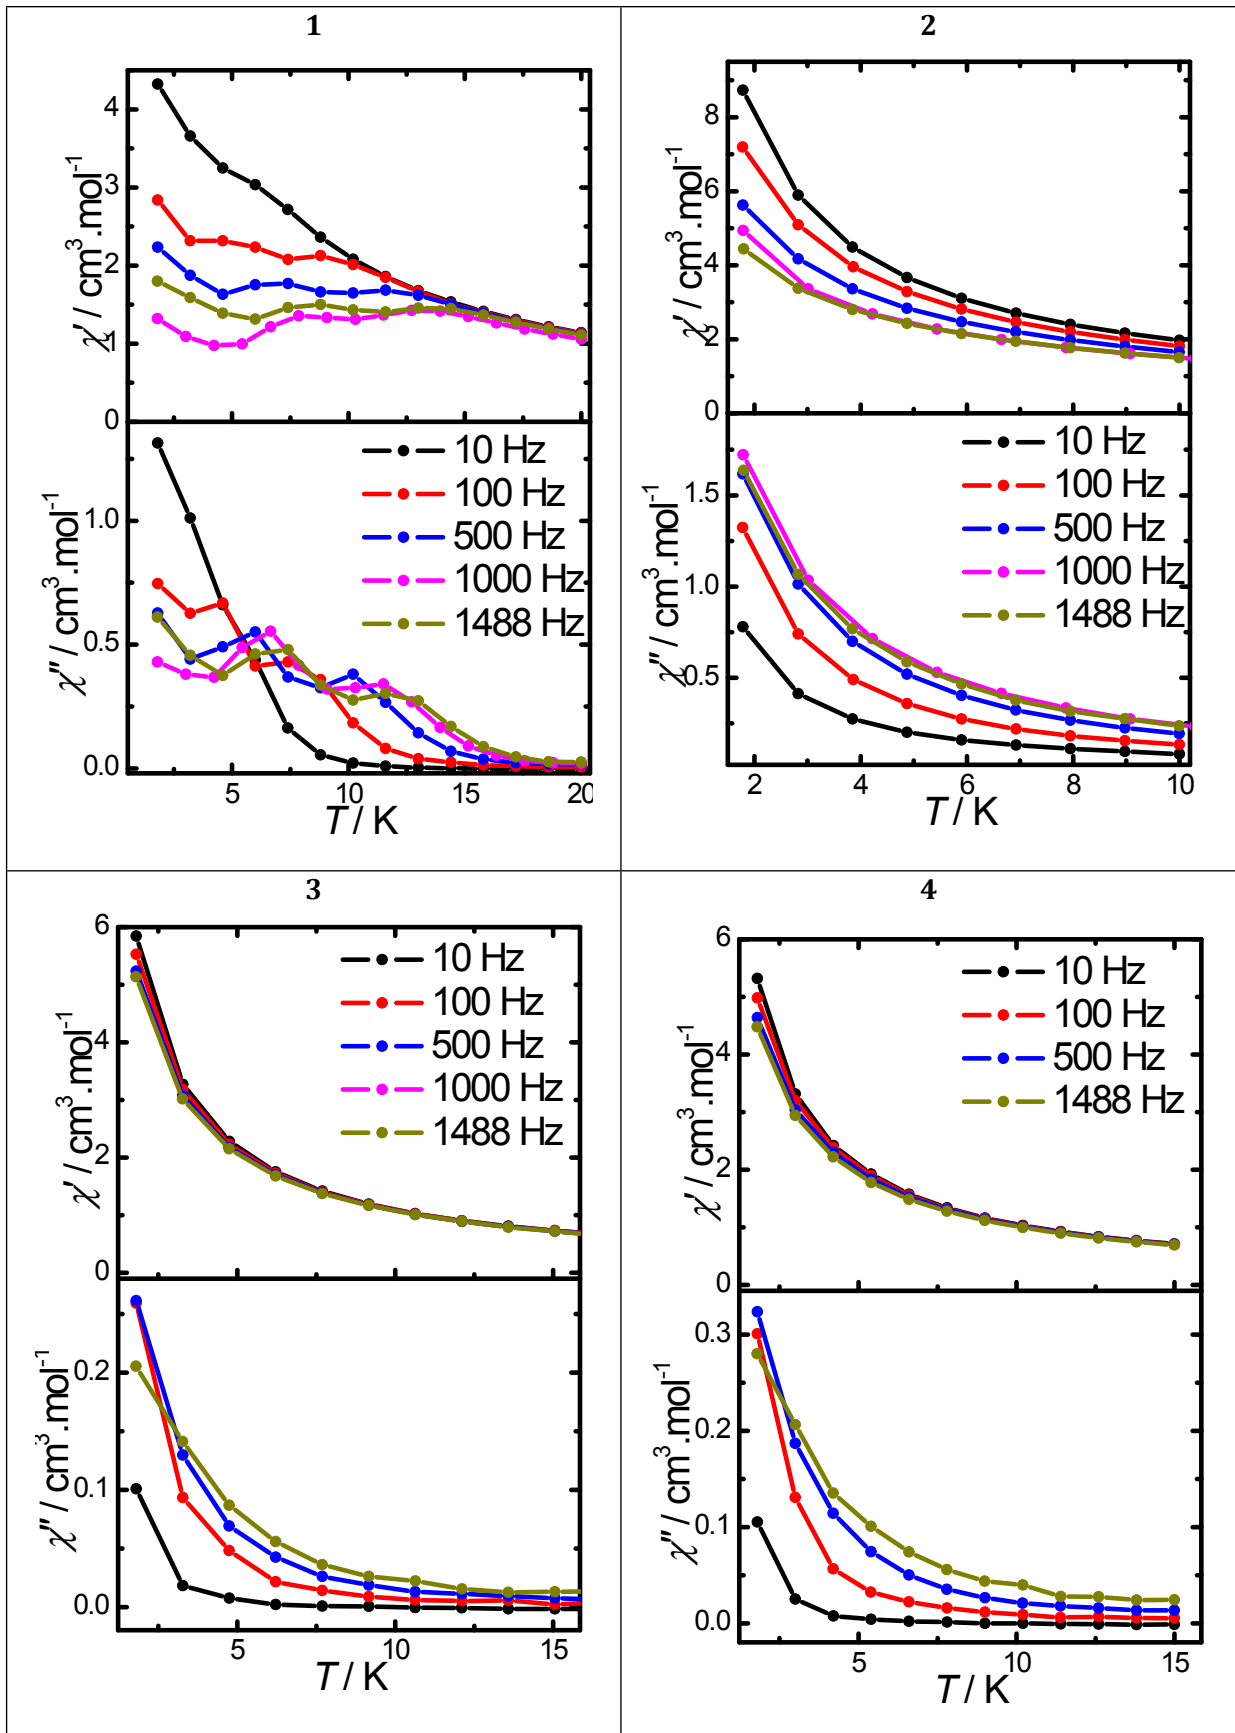

**Figure S4:** Temperature dependence of  $\chi'$  and  $\chi''$  for **1-4** for different frequencies under a zero dc-field.

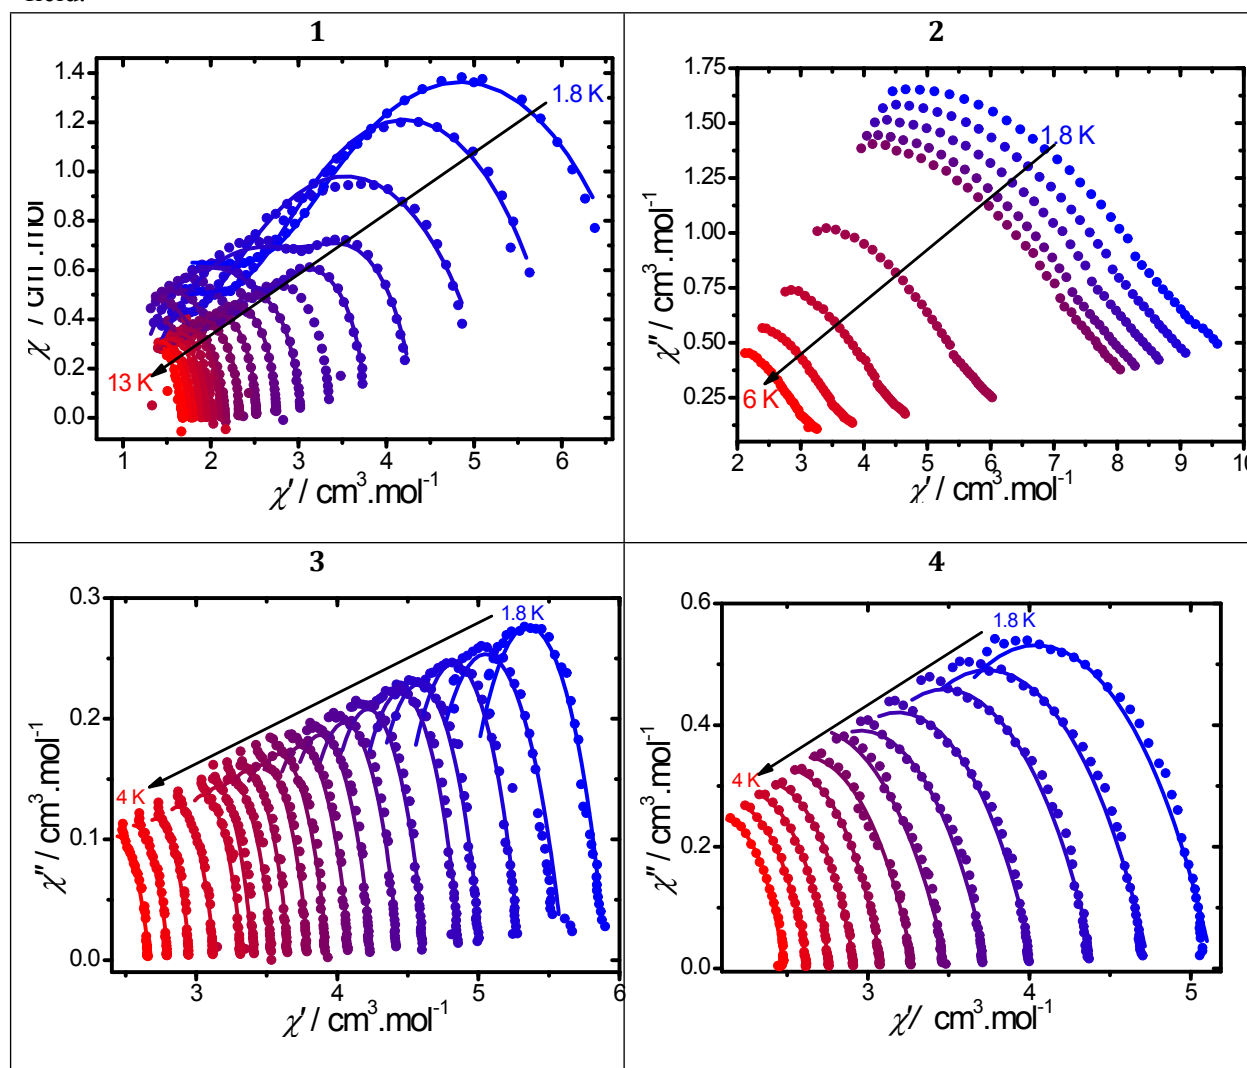

**Figure S5:** Cole-Cole (Argand) plot obtained using the ac susceptibility data for **1-4** (0 Oe). The solid lines correspond to the best fit with a generalized Debye model or with a sum of two Debye functions.<sup>5</sup>



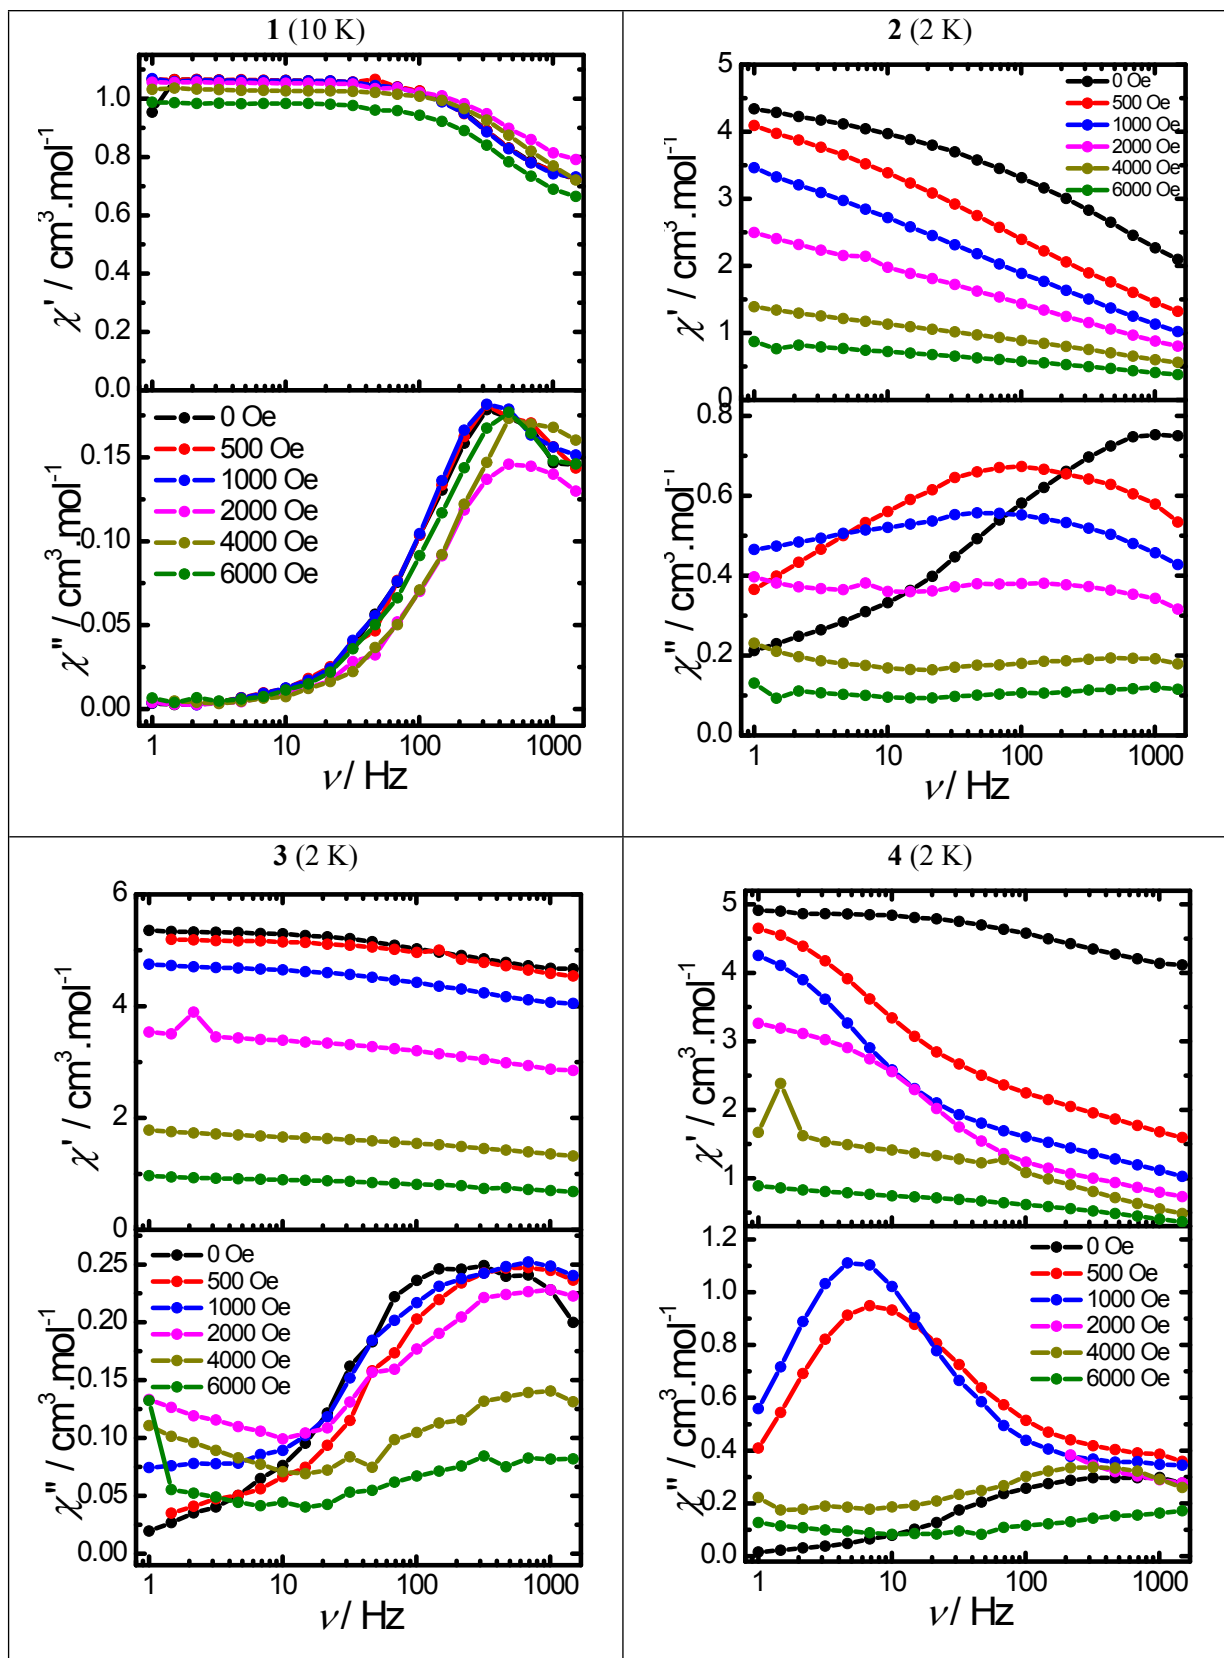

**Figure S6:** Frequency dependence of the in-phase ( $\chi'$ ) and out-of phase ( $\chi''$ ) susceptibilities for 1- 4 under various dc fields.

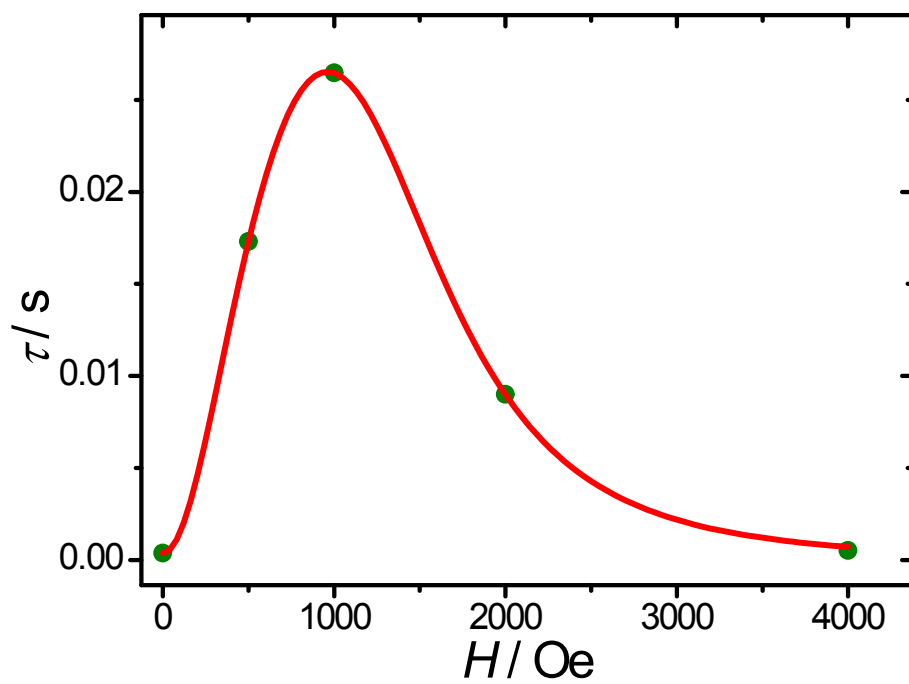

**Figure S7:** Field dependence of the relaxation time for **4** (2 K). The red line represents the fit with Eq. 3.

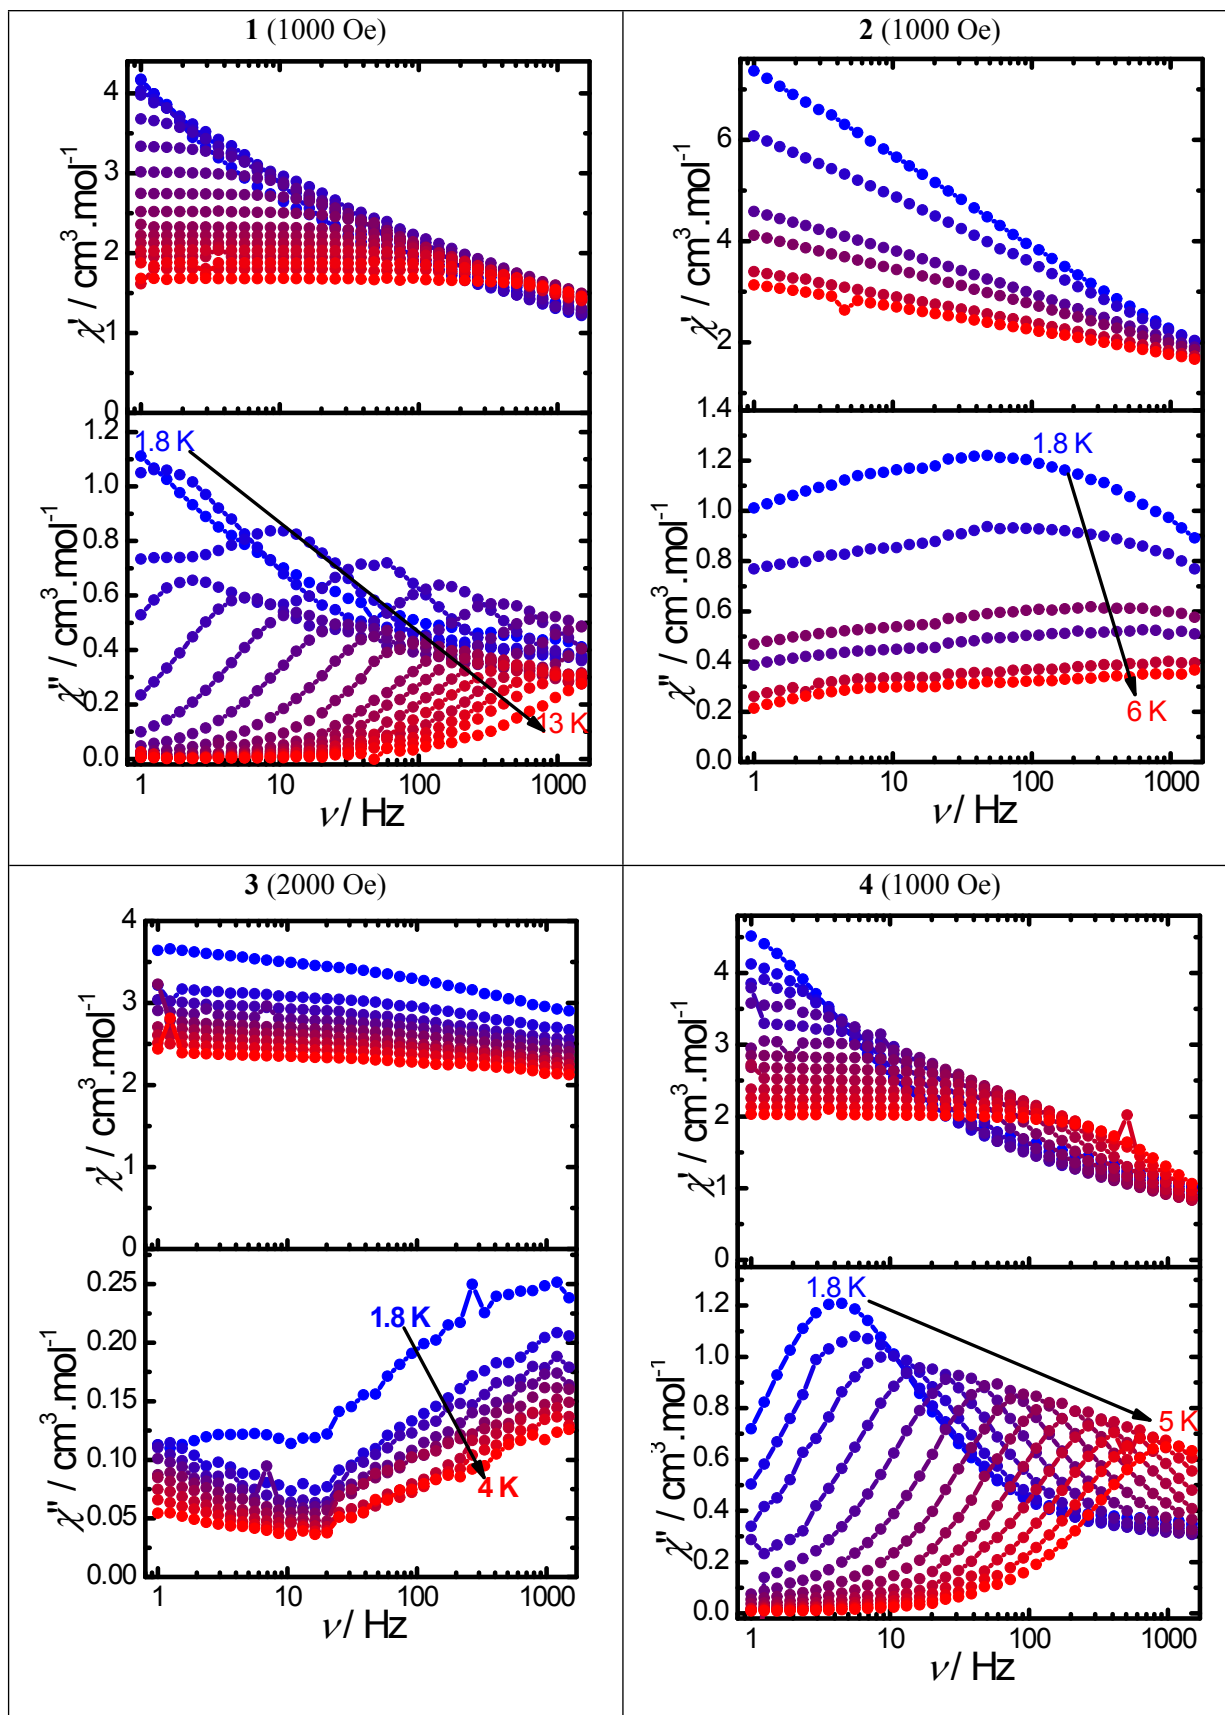

**Figure S8:** Frequency dependence of the in-phase ( $\chi'$ ) and out-of phase ( $\chi''$ ) susceptibilities for **1-4** under the corresponding dc-fields.

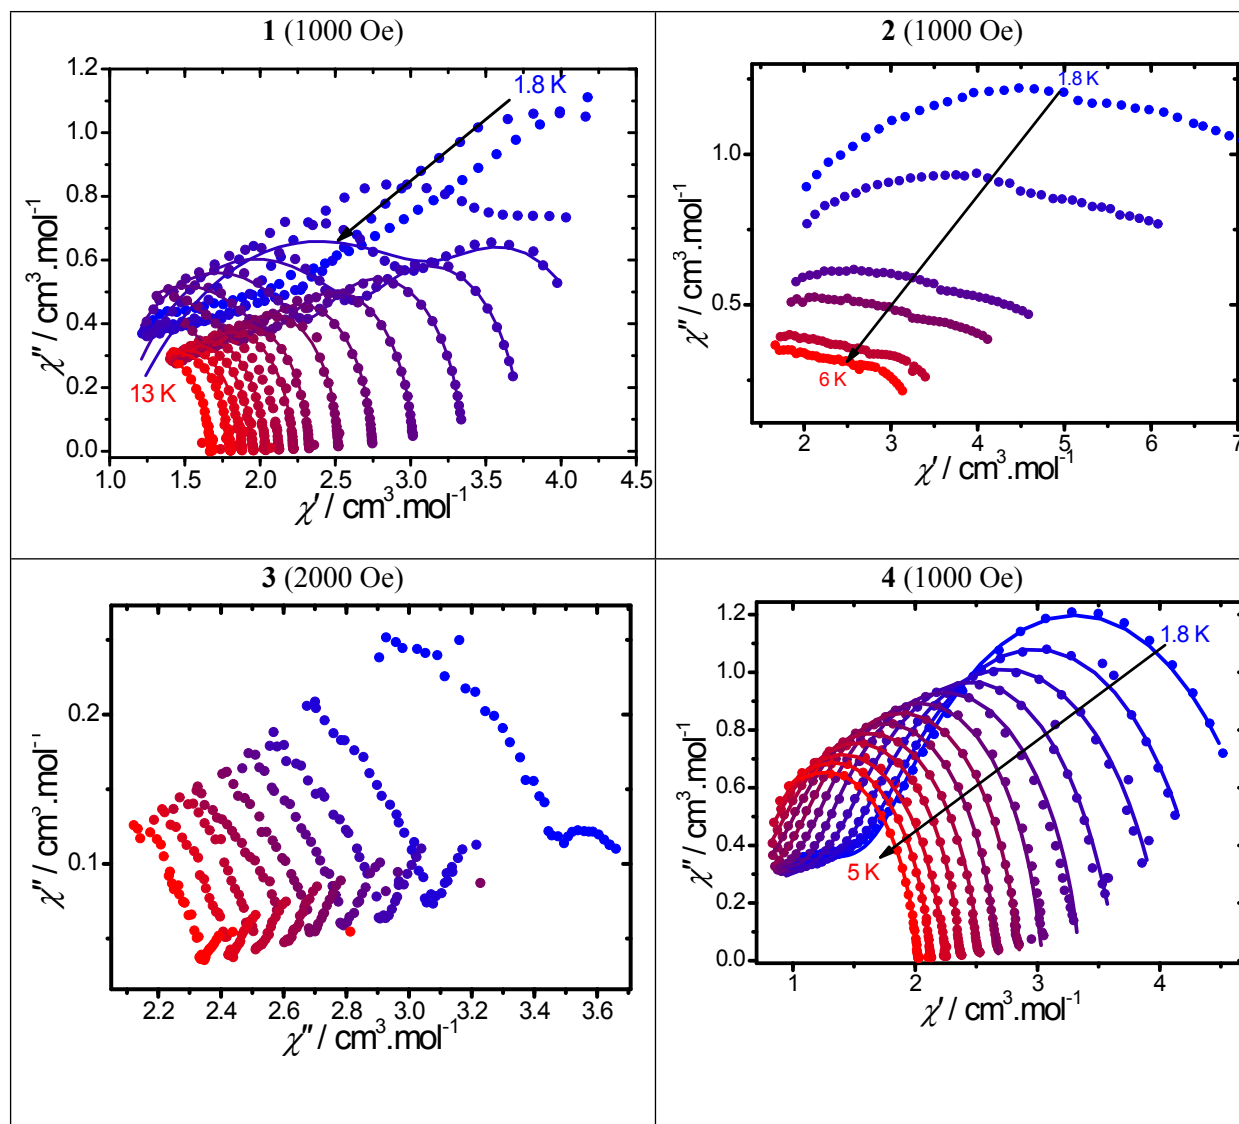

**Figure S9:** Cole-Cole (Argand) plot obtained using the ac susceptibility data for **1-4** under the corresponding dc fields. The solid lines correspond to the best fit with a generalized Debye model or with a sum of two Debye functions.

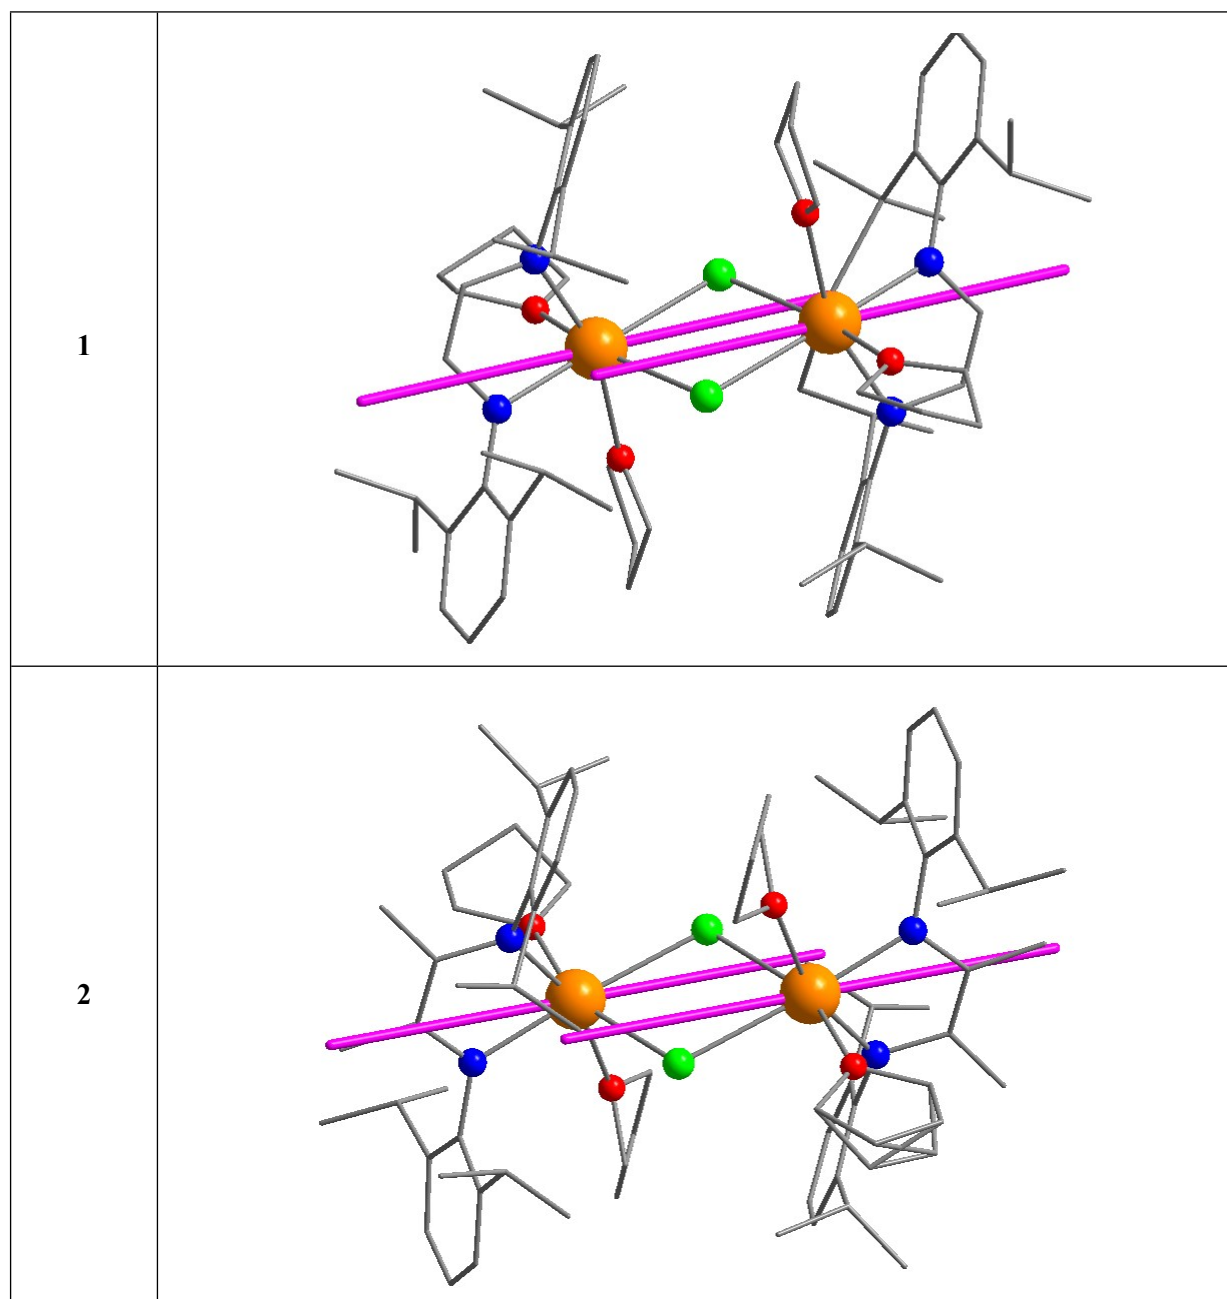

**Figure S10:** Orientation of the anisotropic axis (purple) in **1-2** obtained from the MAGELLAN software.<sup>1</sup>

|   | N1    | C1    | C2    | N2    | Orientation                                                                          |
|---|-------|-------|-------|-------|--------------------------------------------------------------------------------------|
| 3 | -1/4  | -1/4  | -1/4  | -1/4  | 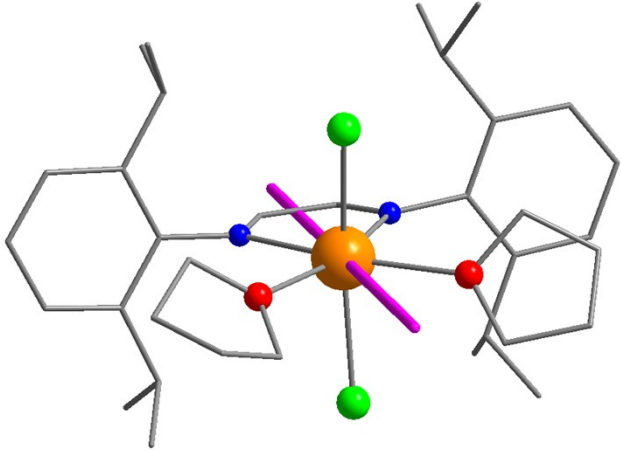   |
|   | -3/8  | -1/8  | -1/8  | -3/8  |   |
|   | -4/10 | -1/10 | -1/10 | -4/10 |  |

**Figure S11:** Orientation of the anisotropic axis (purple) in **3** obtained from the MAGELLAN<sup>1</sup> software and considering different negative charge values on the atoms of the NCCN fragment.

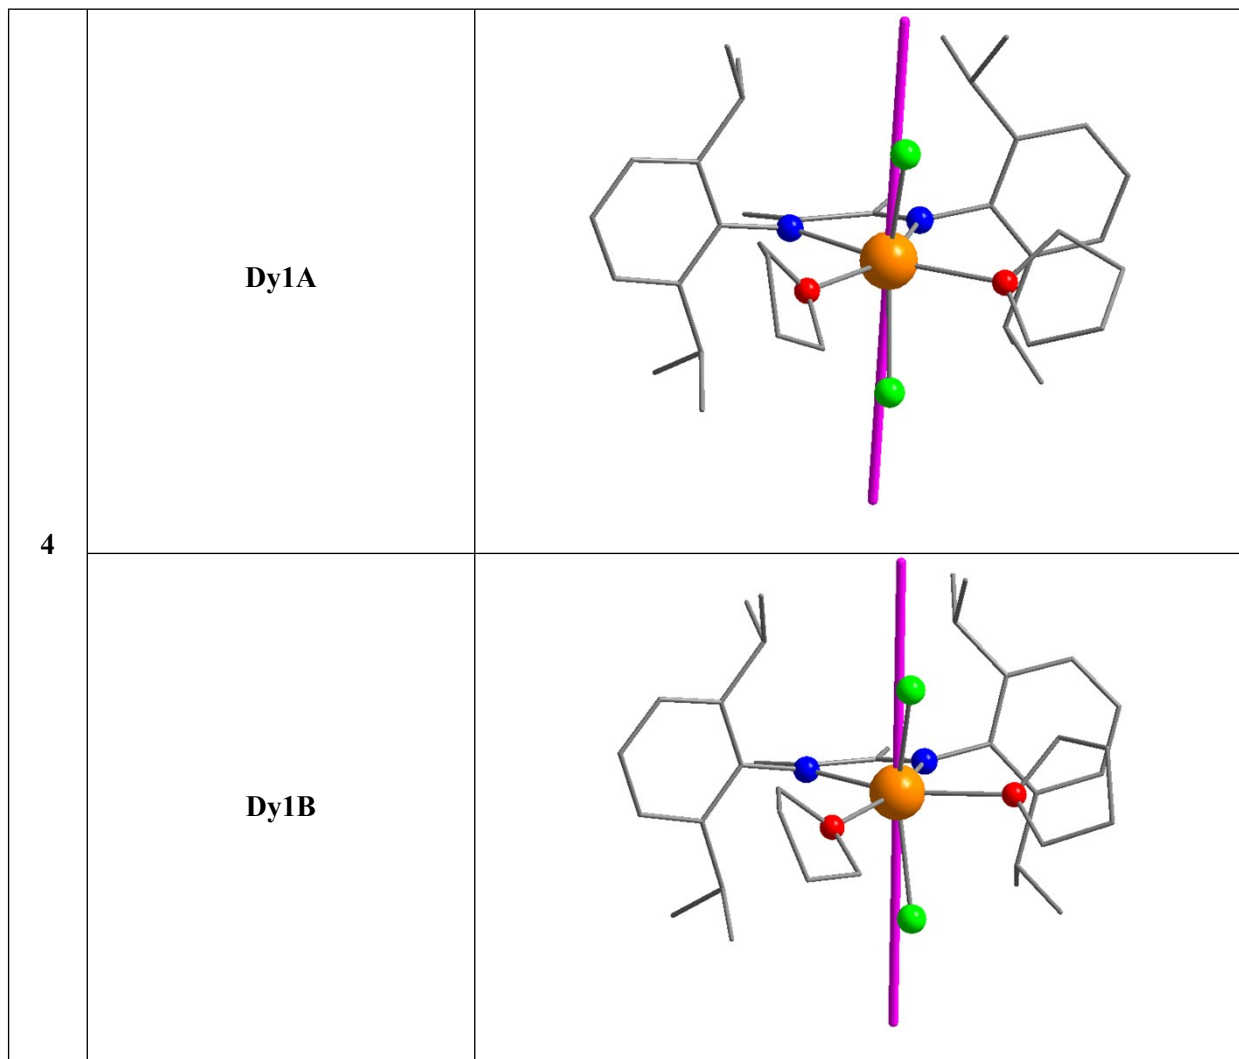

**Figure S12:** Orientation of the anisotropic axis (purple) in **4** obtained from the MAGELLAN software.<sup>1</sup>

**Table S1.** Crystal Data and Structure Refinement Details for Complexes 1-4

|                                                     | <b>1</b>                                                                                                                            | <b>2</b>                                                                                                                                      | <b>3</b>                                                                                                                                        | <b>4</b>                                                                                                                                   |
|-----------------------------------------------------|-------------------------------------------------------------------------------------------------------------------------------------|-----------------------------------------------------------------------------------------------------------------------------------------------|-------------------------------------------------------------------------------------------------------------------------------------------------|--------------------------------------------------------------------------------------------------------------------------------------------|
| Empirical formula                                   | C <sub>68</sub> H <sub>104</sub> Cl <sub>2</sub> Dy <sub>2</sub> N <sub>4</sub> O <sub>4</sub>                                      | C <sub>72</sub> H <sub>112</sub> Cl <sub>2</sub> Dy <sub>2</sub> N <sub>4</sub> O <sub>4</sub> ,<br>½C <sub>4</sub> H <sub>8</sub> O          | C <sub>34</sub> H <sub>52</sub> Cl <sub>2</sub> DyN <sub>2</sub> O <sub>2</sub>                                                                 | C <sub>36</sub> H <sub>55</sub> Cl <sub>2</sub> DyN <sub>2</sub> O <sub>2</sub>                                                            |
| Formula Weight                                      | 1437.45                                                                                                                             | 1529.60                                                                                                                                       | 754.17                                                                                                                                          | 781.22                                                                                                                                     |
| <i>T</i> , K                                        | 100(2)                                                                                                                              | 120(2)                                                                                                                                        | 120(2)                                                                                                                                          | 120(2)                                                                                                                                     |
| Crystal System                                      | Orthorhombic                                                                                                                        | Monoclinic                                                                                                                                    | Monoclinic                                                                                                                                      | Monoclinic                                                                                                                                 |
| Space Group                                         | <i>Pbca</i>                                                                                                                         | <i>P2<sub>1</sub>/n</i>                                                                                                                       | <i>P2<sub>1</sub>/n</i>                                                                                                                         | <i>P2<sub>1</sub></i>                                                                                                                      |
| Unit Cell Dimensions                                | <i>a</i> = 19.2467(7) Å<br><i>b</i> = 15.3525(5) Å<br><i>c</i> = 23.2322(8) Å<br><i>α</i> = 90°<br><i>β</i> = 90°<br><i>γ</i> = 90° | <i>a</i> = 15.3844(6) Å<br><i>b</i> = 16.0197(7) Å<br><i>c</i> = 15.8221(7) Å<br><i>α</i> = 90°<br><i>β</i> = 109.7810(10)°<br><i>γ</i> = 90° | <i>a</i> = 10.1402(6) Å<br><i>b</i> = 19.7105(10) Å<br><i>c</i> = 18.5480(10) Å<br><i>α</i> = 90°<br><i>β</i> = 105.4108(12)°<br><i>γ</i> = 90° | <i>a</i> = 13.6988(2) Å<br><i>b</i> = 17.3825(3) Å<br><i>c</i> = 15.4968(3) Å<br><i>α</i> = 90°<br><i>β</i> = 90.143(2)°<br><i>γ</i> = 90° |
| <i>V</i> , Å <sup>3</sup>                           | 6864.8(4)                                                                                                                           | 3669.3(3)                                                                                                                                     | 3573.9(3)                                                                                                                                       | 3690.08(11)                                                                                                                                |
| <i>Z</i>                                            | 4                                                                                                                                   | 2                                                                                                                                             | 4                                                                                                                                               | 4                                                                                                                                          |
| <i>d</i> <sub>calc</sub> , g/cm <sup>3</sup>        | 1.391                                                                                                                               | 1.384                                                                                                                                         | 1.402                                                                                                                                           | 1.406                                                                                                                                      |
| <i>μ</i> , mm <sup>-1</sup>                         | 2.285                                                                                                                               | 2.142                                                                                                                                         | 2.270                                                                                                                                           | 2.201                                                                                                                                      |
| <i>F</i> <sub>000</sub>                             | 2952                                                                                                                                | 1580                                                                                                                                          | 1544                                                                                                                                            | 1604                                                                                                                                       |
| Crystal Size, mm                                    | 0.57 × 0.38 × 0.18                                                                                                                  | 0.43 × 0.23 × 0.20                                                                                                                            | 0.32 × 0.20 × 0.12                                                                                                                              | 0.50 × 0.32 × 0.31                                                                                                                         |
| <i>θ</i> Range for Data Collection, °               | 2.44–30.03                                                                                                                          | 1.60–30.03                                                                                                                                    | 1.54–30.03                                                                                                                                      | 2.97–30.03                                                                                                                                 |
| Index Ranges                                        | –27 ≤ <i>h</i> ≤ 27<br>–21 ≤ <i>k</i> ≤ 21<br>–32 ≤ <i>l</i> ≤ 32                                                                   | –21 ≤ <i>h</i> ≤ 21<br>–22 ≤ <i>k</i> ≤ 22<br>–22 ≤ <i>l</i> ≤ 22                                                                             | –14 ≤ <i>h</i> ≤ 14<br>–27 ≤ <i>k</i> ≤ 27<br>–26 ≤ <i>l</i> ≤ 26                                                                               | –19 ≤ <i>h</i> ≤ 19<br>–24 ≤ <i>k</i> ≤ 24<br>–21 ≤ <i>l</i> ≤ 21                                                                          |
| Reflns Collected                                    | 109 203                                                                                                                             | 46 802                                                                                                                                        | 107 359                                                                                                                                         | 74 444                                                                                                                                     |
| Independent Reflns ( <i>R</i> <sub>int</sub> )      | 10 040 (0.0408)                                                                                                                     | 10 734 (0.0459)                                                                                                                               | 10 451 (0.0599)                                                                                                                                 | 21 544 (0.0341)                                                                                                                            |
| Parameters (Restraints)                             | 425 (70)                                                                                                                            | 455 (78)                                                                                                                                      | 386 (0)                                                                                                                                         | 804 (1)                                                                                                                                    |
| Completeness to <i>θ</i> , %                        | 99.9                                                                                                                                | 100.0                                                                                                                                         | 100.0                                                                                                                                           | 99.8                                                                                                                                       |
| <i>S</i> ( <i>F</i> <sup>2</sup> )                  | 1.057                                                                                                                               | 1.009                                                                                                                                         | 1.022                                                                                                                                           | 1.018                                                                                                                                      |
| Flack (absolute structure) parameter                |                                                                                                                                     |                                                                                                                                               | 0.12(2)                                                                                                                                         |                                                                                                                                            |
| Final <i>R</i> Indices ( <i>I</i> > 2σ( <i>I</i> )) | <i>R</i> <sub>1</sub> = 0.0211<br>w <i>R</i> <sub>2</sub> = 0.0451                                                                  | <i>R</i> <sub>1</sub> = 0.0272<br>w <i>R</i> <sub>2</sub> = 0.0559                                                                            | <i>R</i> <sub>1</sub> = 0.0224<br>w <i>R</i> <sub>2</sub> = 0.0485                                                                              | <i>R</i> <sub>1</sub> = 0.0303<br>w <i>R</i> <sub>2</sub> = 0.0688                                                                         |
| Final <i>R</i> Indices (all data)                   | <i>R</i> <sub>1</sub> = 0.0295<br>w <i>R</i> <sub>2</sub> = 0.0480                                                                  | <i>R</i> <sub>1</sub> = 0.0429<br>w <i>R</i> <sub>2</sub> = 0.0619                                                                            | <i>R</i> <sub>1</sub> = 0.0287<br>w <i>R</i> <sub>2</sub> = 0.0509                                                                              | <i>R</i> <sub>1</sub> = 0.0350<br>w <i>R</i> <sub>2</sub> = 0.0711                                                                         |
| Largest Diff Peak and Hole, e/Å <sup>3</sup>        | 0.62 / –0.97                                                                                                                        | 0.91 / –0.80                                                                                                                                  | 0.97 / –0.85                                                                                                                                    | 0.73 / –1.01                                                                                                                               |

**Table S2.** SHAPE analysis for compounds 1-3.

|                 | <b>HP</b> | <b>PPY</b> | <b>OC</b> | <b>TPR</b> | <b>JPPY</b> |
|-----------------|-----------|------------|-----------|------------|-------------|
| <b>1</b>        | 33.440    | 21.464     | 2.556     | 11.733     | 24.621      |
| <b>2</b>        | 30.651    | 21.411     | 3.368     | 11.9961    | 24.288      |
| <b>3</b>        | 34.524    | 21.375     | 2.835     | 9.436      | 25.884      |
| <b>4 (Dy1A)</b> | 36.196    | 17.823     | 4.991     | 8.050      | 22.397      |
| <b>4 (Dy1B)</b> | 35.268    | 15.540     | 6.261     | 6.614      | 19.958      |

HP: Hexagon  
PPY: Pentagonal Pyramid



---

OC: Octahedron  
 TPR: Trigonal Prism  
 JPPY: Johnson Pentagonal Pyramid

---

**Table S3.** Fitting of the Cole-Cole plots with a sum of two generalized Debye functions under a zero dc-field for **1** in the temperature range 1.8-3.4 K.

| $T$ (K) | $\chi_{S_{tot}}$ | $\Delta\chi_1$ | $\alpha_1$ | $\Delta\chi_2$ | $\alpha_2$ |
|---------|------------------|----------------|------------|----------------|------------|
| 1.8     | 1.74813E-5       | 3.00748        | 0.53513    | 4.14098        | 0.30252    |
| 2.6     | 2.29322E-5       | 3.0192         | 0.61971    | 3.05994        | 0.2269     |
| 3.4     | 6.26249E-5       | 2.21852        | 0.58985    | 3.02116        | 0.31659    |

**Table S4.** Fitting of the Cole-Cole plots with a sum of two generalized Debye functions under a zero dc-field for **1** in the temperature range 4.2-5.8 K.

| $T$ (K) | $\chi_{S_{tot}}$ | $\Delta\chi_1$ | $\alpha_1$ | $\Delta\chi_2$ | $\alpha_2$ |
|---------|------------------|----------------|------------|----------------|------------|
| 4.2     | 1.13926          | 0.74529        | 2.27817E-8 | 2.47032        | 0.39651    |
| 5       | 1.07482          | 0.94937        | 2.22696E-8 | 1.74271        | 0.25781    |
| 5.8     | 0.92454          | 0.92129        | 8.12134E-8 | 1.5118         | 0.22107    |
| 6.6     | 0.85192          | 0.87944        | 1.38927E-7 | 1.2723         | 0.16111    |
| 7.4     | 0.60068          | 0.7933         | 1.63451E-7 | 1.35265        | 0.21485    |
| 8.2     | 0.17664          | 0.71221        | 7.00797E-7 | 1.63274        | 0.29722    |
| 9       | 0.00117          | 0.66031        | 1.37183E-6 | 1.67163        | 0.30663    |
| 9.8     | 0.00181          | 0.56631        | 2.11023E-6 | 1.59686        | 0.367      |
| 10      | 0.00227          | 0.57103        | 2.44404E-6 | 1.55074        | 0.37856    |
| 10.6    | 0.00281          | 0.52062        | 3.70545E-6 | 1.50054        | 0.41455    |
| 11      | 0.0034           | 0.50263        | 5.43333E-6 | 1.4384         | 0.35932    |
| 11.4    | 0.0048           | 0.46784        | 5.31582E-6 | 1.42342        | 0.39733    |
| 12      | 0.00561          | 0.4167         | 7.86266E-6 | 1.37402        | 0.38844    |
| 12.2    | 2.0557E-7        | 0.3809         | 1.58797E-5 | 1.39947        | 0.36148    |
| 13      | 4.7671E-7        | 0.20902        | 9.87394E-6 | 1.46957        | 0.24383    |

**Table S5.** Fitting of the Cole-Cole plots with a generalized Debye model under a zero dc field for **3**.

| $T$ (K) | $\chi_s$ | $\chi_r$ | $\alpha$ |
|---------|----------|----------|----------|
| 1.8     | 4.80576  | 5.9026   | 0.39817  |
| 1.9     | 4.49632  | 5.60558  | 0.38874  |
| 2       | 4.35738  | 5.29468  | 0.39789  |
| 2.1     | 4.13023  | 5.02445  | 0.39849  |
| 2.2     | 4.02175  | 4.87347  | 0.40395  |
| 2.3     | 3.81128  | 4.62431  | 0.40076  |
| 2.4     | 3.66648  | 4.43693  | 0.4162   |
| 2.5     | 3.50906  | 4.24709  | 0.40465  |
| 2.6     | 3.39341  | 4.09027  | 0.40192  |
| 2.7     | 3.24128  | 3.93354  | 0.41594  |
| 2.8     | 3.15623  | 3.79894  | 0.35362  |
| 2.9     | 3.04335  | 3.65962  | 0.41914  |
| 3       | 2.94766  | 3.54677  | 0.42764  |
| 3.1     | 2.88498  | 3.39973  | 0.43122  |
| 3.2     | 2.76947  | 3.32669  | 0.45486  |
| 3.4     | 2.60484  | 3.13154  | 0.45247  |
| 3.6     | 2.46979  | 2.95857  | 0.39817  |
| 3.8     | 2.31684  | 2.80574  | 0.38874  |
| 4       | 2.21929  | 2.66672  | 0.39789  |

**Table S6.** Fitting of the Cole-Cole plots with a generalized Debye model under a zero dc field for 4.

| $T$ (K) | $\chi_s$ | $\chi_r$ | $\alpha$ |
|---------|----------|----------|----------|
| 1.8     | 2.94468  | 5.13758  | 0.42509  |
| 2       | 2.73034  | 4.74524  | 0.42283  |
| 2.2     | 2.54542  | 4.40561  | 0.4162   |
| 2.4     | 2.34045  | 4.03003  | 0.41118  |
| 2.6     | 2.18024  | 3.73928  | 0.40807  |
| 2.8     | 1.84841  | 3.49187  | 0.43223  |
| 3       | 1.94703  | 3.28282  | 0.38903  |

|     |         |         |         |
|-----|---------|---------|---------|
| 3.2 | 1.92777 | 3.08464 | 0.34455 |
| 3.4 | 1.84922 | 2.91778 | 0.33955 |
| 3.6 | 1.76603 | 2.76529 | 0.33258 |
| 3.8 | 1.6877  | 2.6256  | 0.3295  |
| 4   | 1.73153 | 2.47704 | 0.25817 |

**Table S7:** Fit parameters of the temperature dependence of the relaxation time for **1** from a combination of Raman and QTM process (zero field) or Raman (1000 Oe).

| Compound           | $n$             | $C$ ( $s^{-1}.K^{-n}$ ) | $\tau_{QTM}$ (s)   |
|--------------------|-----------------|-------------------------|--------------------|
| <b>1</b> (0 Oe)    | $6.62 \pm 0.06$ | $0.00046 \pm 0.00008$   | $0.0202 \pm 0.006$ |
| <b>1</b> (1000 Oe) | $6.12 \pm 0.09$ | $0.0015 \pm 0.0003$     | -                  |

**Table S8:** Fit parameters of the field dependence of the relaxation time at 15 K for **4**

| Compound       | $D$ ( $s^{-1}K^{-1}Oe^{-4}$ ) | $B_1$ ( $s^{-1}$ ) | $B_2$ ( $Oe^{-2}$ ) | $K$   |
|----------------|-------------------------------|--------------------|---------------------|-------|
| <b>4</b> (2 K) | $2.66 \times 10^{-11}$        | 2676.53            | $3 \times 10^{-4}$  | 24.03 |

**Table S9.** Fitting of the Cole-Cole plots with a sum of two generalized Debye functions under a 1000 Oe dc-field for **1**.

| $T$ (K) | $\chi_{Stot}$ | $\Delta\chi_1$ | $\alpha_1$ | $\Delta\chi_2$ | $\alpha_2$ |
|---------|---------------|----------------|------------|----------------|------------|
| 4.2     | 1.02098       | 2.52682        | 0.00305    | 0.81069        | 0.40534    |
| 5       | 1.01306       | 1.80075        | 8.97045E-4 | 0.93247        | 0.46623    |
| 5.8     | 0.9254        | 1.48861        | 3.60262E-4 | 0.92838        | 0.46419    |
| 6.6     | 0.78456       | 1.36332        | 1.58842E-4 | 0.86529        | 0.43265    |
| 7.4     | 0.5553        | 1.40083        | 6.78429E-5 | 0.78802        | 0.39401    |
| 8.2     | 0.20641       | 1.58677        | 2.49393E-5 | 0.72842        | 0.36421    |
| 9       | 4.90936E-14   | 1.69376        | 1.04483E-5 | 0.63705        | 0.31853    |
| 9.5     | 5.92914E-14   | 1.62554        | 7.41641E-6 | 0.59823        | 0.29912    |
| 10      | 6.84606E-14   | 1.54999        | 4.71087E-6 | 0.57659        | 0.2883     |
| 10.5    | 7.8863E-14    | 1.48895        | 4.05468E-6 | 0.54691        | 0.27346    |
| 11      | 9.79336E-14   | 1.47491        | 2.56557E-6 | 0.49151        | 0.24576    |

|      |             |         |            |         |         |
|------|-------------|---------|------------|---------|---------|
| 11.5 | 8.7493E-14  | 1.3974  | 4.10967E-6 | 0.47339 | 0.23669 |
| 12   | 1.01225E-13 | 1.35158 | 4.80929E-6 | 0.44003 | 0.22002 |
| 13   | 2.14198E-13 | 1.3419  | 3.35608E-6 | 0.33939 | 0.1697  |

**Table S10.** Fitting of the Cole-Cole plots with a sum of two generalized Debye functions under a 1000 Oe dc-field for **4**.

| $T$ (K) | $\chi_{Stot}$ | $\Delta\chi_1$ | $\alpha_1$ | $\Delta\chi_2$ | $\alpha_2$ |
|---------|---------------|----------------|------------|----------------|------------|
| 1.8     | 0.55214       | 1.86687        | 0.55214    | 3.13122        | 0.03713    |
| 2.06    | 0.65521       | 1.98055        | 0.60916    | 2.46211        | 0.02685    |
| 2.33    | 0.54284       | 1.74712        | 0.5834     | 2.31935        | 0.0172     |
| 2.60    | 0.44246       | 1.92869        | 0.65521    | 1.7973         | 0.00934    |
| 2.86    | 0.34622       | 1.31105        | 0.44848    | 2.03688        | 0.00515    |
| 3.13    | 0.55214       | 1.3878         | 0.52624    | 1.66406        | 0.00296    |
| 3.40    | 0.65521       | 1.34566        | 0.54284    | 1.52975        | 0.00177    |
| 3.66    | 0.54284       | 1.22778        | 0.51038    | 1.4654         | 0.00111    |
| 3.93    | 0.44246       | 1.09761        | 0.49424    | 1.4418         | 7.11662E-4 |
| 4.30    | 0.34622       | 1.00565        | 0.44246    | 1.37359        | 4.79089E-4 |
| 4.45    | 0.55214       | 0.80091        | 0.6376     | 1.46698        | 2.68913E-4 |
| 4.73    | 0.65521       | 0.74062        | 0.37738    | 1.38808        | 2.25593E-4 |
| 5       | 0.54284       | 1.16865        | 0.34622    | 0.8647         | 1.94696E-4 |

## References

- 1 N. F. Chilton, D. Collison, E. J. L. McInnes, R. E. P. Winpenny and A. Soncini, *Nat. Commun.*, 2013, **4**, 2551.
